# Supplementary material for: Self-cleaning cotton
Source: Royal Society of Chemistry journal article supplement (doi:10.1039/b610861j), 2006-01-01
Supplement: b610861j.pdf [file b610861j.pdf]

## Supplementary information

### Self-cleaning Cotton

Kaihong Qi<sup>a</sup>, Walid A. Daoud<sup>a</sup>, John H. Xin<sup>\*a</sup>, C. L. Mak<sup>b</sup>, Waisze Tang<sup>a</sup>

<sup>a</sup> Nanotechnology Center, Institute of Textiles & Clothing, The Hong Kong Polytechnic University, Hung Hom, Hong Kong.

<sup>b</sup> Department of Applied Physics, The Hong Kong Polytechnic University, Hung Hom, Hong Kong.

\* Corresponding author. Tel.: +852 2766 6474; fax: +852 2773 1432;  
Email address: [tcxinjh@inet.polyu.edu.hk](mailto:tcxinjh@inet.polyu.edu.hk)

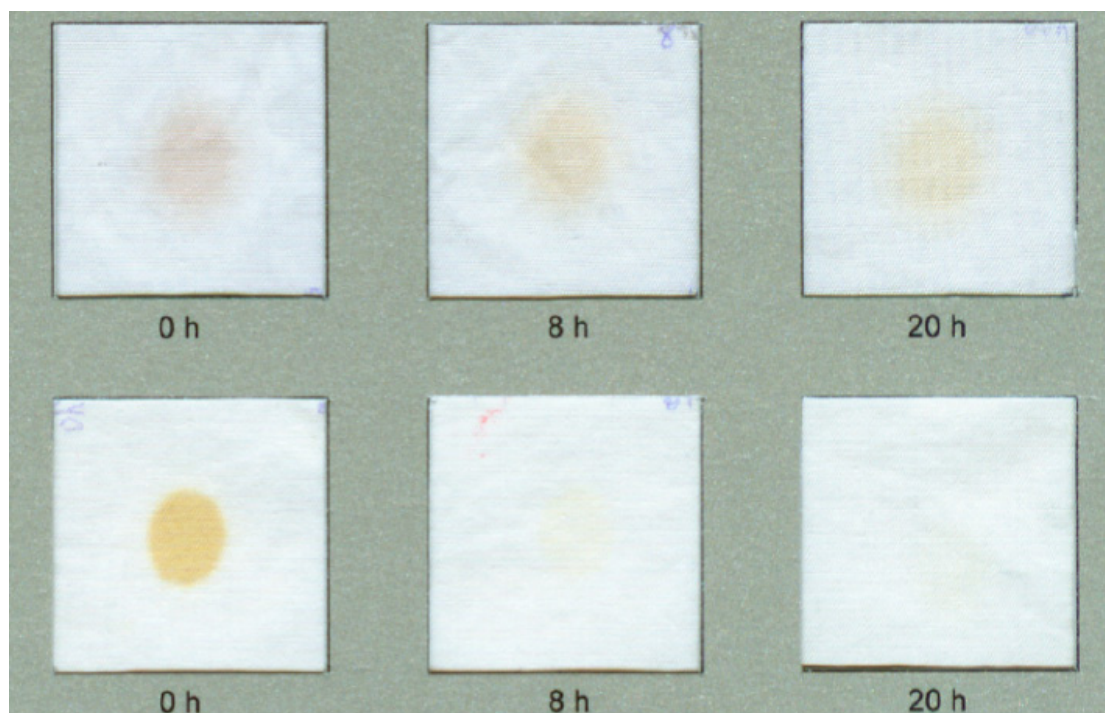

Fig. S1 Degradation of white cotton samples stained with a red wine on the back side of pristine cotton (the upper row) and titania coated cotton fabrics (the bottom row) after 0 h, 8 h and 20 h of light irradiation in a solar light with 45-95 mW/cm<sup>2</sup>.

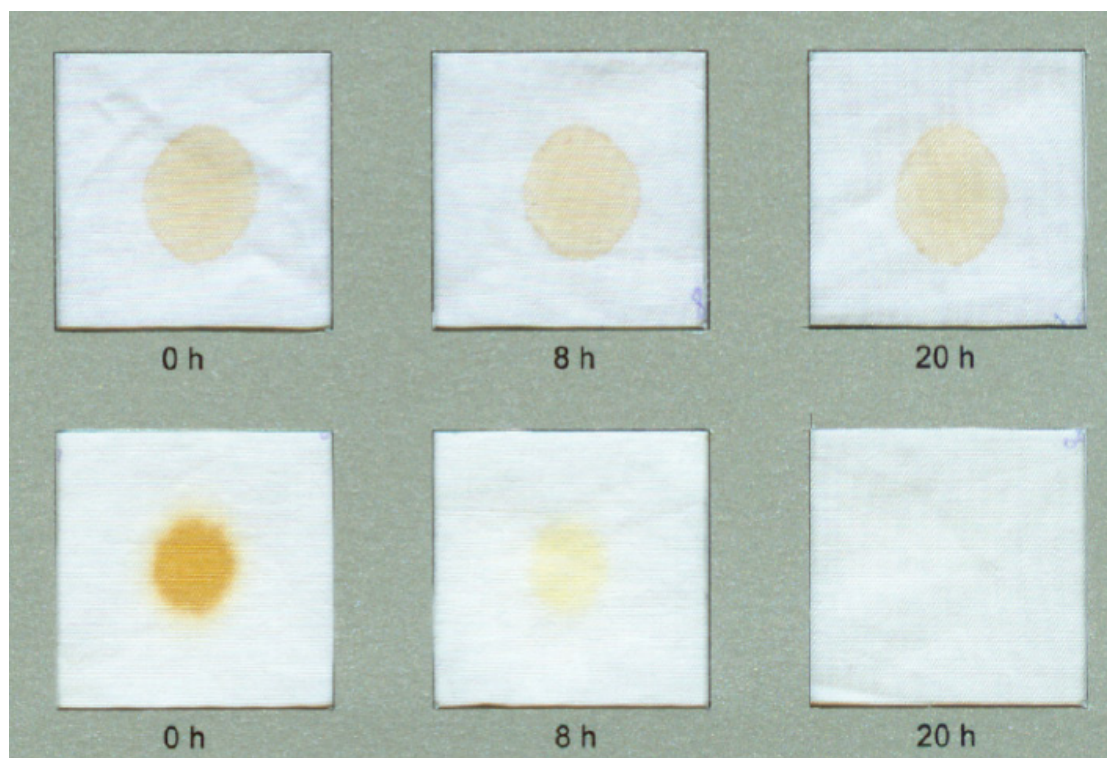

Fig. S2 Degradation of white cotton samples stained a coffee stain on the back side of pristine cotton (the upper row) and titania coated cotton fabrics (the bottom row) after 0 h, 8 h and 20 h of light irradiation in a solar light with  $45\text{-}95\text{ mW/cm}^2$ .
